# Supplementary material for: Investigation of the electrical properties of standard and low-gas-flow ICPs using novel probes for the direct measurements of RF voltage and current in the load coil and the corresponding calculation of the ICP power
Source: Royal Society of Chemistry journal article supplement (doi:10.1039/c5ja00154d), 2015-01-01
Supplement: c5ja00154d1.pdf [file c5ja00154d1.pdf]

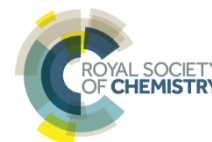

Journal Name

ARTICLE

## Electronic Supplementary Information for: Investigation of the electrical properties of standard and low-gas-flow ICPs using novel probes for the direct measurements of RF voltage and current in the load coil and corresponding calculation of the ICP power

Received 00th January 20xx,  
Accepted 00th January 20xx

DOI: 10.1039/x0xx00000x

[www.rsc.org/](http://www.rsc.org/)

M. Voronov,<sup>\*a</sup> V. Hoffmann,<sup>a</sup> D. Birus,<sup>b</sup> C. Engelhard,<sup>c</sup> W. Buscher<sup>d</sup>

Table S-1. Wavelength, excitation energies, and transition probabilities of lines of the OH (0,0) rotational band ( $A^2\Sigma^+ \rightarrow X^2\Pi_i$ ), which were used for calculation of the OH rotational temperature. Fundamental data are taken from [1].

| Wavelength (nm) | Transition probability (GHz) | Excitation energy (eV) |
|-----------------|------------------------------|------------------------|
| 308.328         | 3.37                         | 4.06414                |
| 308.520         | 4.22                         | 4.08507                |
| 308.734         | 5.06                         | 4.11009                |
| 309.859         | 8.41                         | 4.25                   |
| 311.022         | 10.88                        | 4.396                  |
| 313.689         | 14.96                        | 4.712                  |
| 314.301         | 15.77                        | 4.785                  |
| 314.746         | 4.75                         | 4.29517                |
| 317.708         | 6.4                          | 4.51219                |
| 318.608         | 6.81                         | 4.57538                |
| 319.485         | 7.22                         | 4.64199                |

<sup>a</sup> IFW Dresden, Institute for Complex Materials, P.O. Box 270116, D-01171 Dresden, Germany

<sup>b</sup> Ingenieurbüro Dr. Dietrich Birus, Steinsetzerweg 2, D-04442 Zwenkau, Germany

<sup>c</sup> University of Siegen, Department of Chemistry & Biology, Adolf-Reichwein-Str. 2, D-57076 Siegen, Germany

<sup>d</sup> University of Münster, Institute of Inorganic and Analytical Chemistry, Corrensstrasse 30, D-48149 Münster, Germany

E-mail: VoronovMV@mail.ru

Electronic Supplementary Information (ESI) available: [Supplementary information.doc]. See DOI: 10.1039/x0xx00000x

Table S-2. Wavelength, excitation energies, transition probabilities and level degeneracy of Fe lines, which were used for calculation of the excitation temperature. Fundamental data are taken from [2].

| Wavelength (nm) | Transition probability (MHz) | Excitation energy (eV) | Degeneracy |
|-----------------|------------------------------|------------------------|------------|
| 370.557         | 3.21                         | 3.39651                | 7          |
| 370.925         | 15.6                         | 4.25622                | 7          |
| 371.994         | 16.2                         | 3.33202                | 11         |
| 372.256         | 4.97                         | 3.41695                | 5          |
| 372.762         | 22.4                         | 4.28331                | 5          |
| 373.24          | 26.9                         | 5.51876                | 5          |
| 373.332         | 6.48                         | 3.43019                | 3          |
| 373.487         | 90.1                         | 4.1777                 | 11         |
| 373.713         | 14.1                         | 3.36826                | 9          |
| 373.831         | 34.4                         | 6.58276                | 13         |
| 374.556         | 11.5                         | 3.39651                | 7          |
| 374.826         | 9.15                         | 3.41695                | 5          |
| 374.949         | 76.3                         | 4.22036                | 9          |
| 375.824         | 63.4                         | 4.25622                | 7          |
| 376.379         | 54.4                         | 4.28331                | 5          |
| 376.554         | 95.1                         | 6.52839                | 15         |
| 376.719         | 63.9                         | 4.30128                | 3          |
| 378.788         | 12.9                         | 4.28331                | 5          |
| 379.5           | 11.5                         | 4.25622                | 7          |

## References

- 1 G.H. Dieke, H.M. Crosswhite, *J. Quant. Spectrosc. Radiat. Transfer*, 1962, **2**, 97.
- 2 NIST Atomic Spectra Database, available: <http://physics.nist.gov/asd>. National Institute of Standards and Technology, Gaithersburg, MD.
